# Supplementary material for: Novel organically linked ZnII hydrogenselenite coordination polymers: synthesis, characterization, and efficient TiO2 photosensitization for enhanced photocatalytic hydrogen production
Source: Royal Society of Chemistry journal article supplement (doi:10.1039/d3dt03094f), 2023-01-01
Supplement: d3dt03094f1.pdf [file d3dt03094f1.pdf]

## Dalton Transactions

### *Supporting Information*

# **Novel organically linked Zn<sup>II</sup> hydrogenselenite coordination polymers: synthesis, characterization, and efficient TiO<sub>2</sub> photosensitization for enhanced photocatalytic hydrogen production**

Andressa Lunardi,<sup>a</sup> Tanize Bortolotto,<sup>a</sup> Camila Nunes Cechin,<sup>a</sup> Natália de Freitas Daudt,<sup>b</sup> Melina de Azevedo Mello,<sup>c</sup> Sailer S. dos Santos,<sup>a</sup> Roberta Cargnelutti,<sup>a</sup> Ernesto Schulz Lang<sup>a</sup> and Bárbara Tirloni\*<sup>a</sup>

<sup>a</sup> *Departamento de Química, Universidade Federal de Santa Maria – UFSM, Laboratório de Materiais Inorgânicos – LMI, 97105-900, Santa Maria, RS, Brazil.*  
E-mail: [barbara.tirloni@ufsm.br](mailto:barbara.tirloni@ufsm.br)

<sup>b</sup> *Departamento de Engenharia Mecânica, Universidade Federal de Santa Maria – UFSM, 97105-900, Santa Maria, RS, Brazil.*

<sup>c</sup> *Colégio Técnico Industrial de Santa Maria - CTISM – Universidade Federal de Santa Maria – UFSM, 97105-900, Santa Maria, RS, Brazil.*

## Table of Contents

|                                                                                                                                                           |    |
|-----------------------------------------------------------------------------------------------------------------------------------------------------------|----|
| <b>Table S1.</b> Crystallographic and structure refinement data for compounds <b>1-2</b> .....                                                            | 3  |
| <b>Table S2.</b> Selected bond lengths (Å) and angles (°) for compounds <b>1-2</b> .....                                                                  | 4  |
| <b>Table S3.</b> Selected hydrogen bond lengths (Å) and angles (°) for compounds <b>1-2</b> .....                                                         | 4  |
| <b>Table S4.</b> Time (t) and temperature (T) used to obtain <b>1-2</b> .....                                                                             | 5  |
| <b>Figure S1.</b> ORTEP <sup>12</sup> representation of the polymeric structure of compound <b>1</b> .....                                                | 6  |
| <b>Figure S2.</b> ORTEP <sup>12</sup> representation of the polymeric structure of compound <b>2</b> .....                                                | 6  |
| <b>Figure S3.</b> Simulated and experimental PXRD pattern for $[\text{Zn}(\mu\text{-HSeO}_3)_2(\text{bipy})]_n$ ( <b>1</b> ) .....                        | 7  |
| <b>Figure S4.</b> Simulated and experimental PXRD pattern for $[\text{Zn}(\mu\text{-HSeO}_3)_2(\text{phen})]_n$ ( <b>2</b> ) .....                        | 8  |
| <b>Figure S5.</b> FT-IR spectrum for $[\text{Zn}(\mu\text{-HSeO}_3)_2(\text{bipy})]_n$ ( <b>1</b> ).....                                                  | 9  |
| <b>Figure S6.</b> FT-IR spectrum for $[\text{Zn}(\mu\text{-HSeO}_3)_2(\text{phen})]_n$ ( <b>2</b> ).....                                                  | 9  |
| <b>Figure S7.</b> FT-IR spectrum of photocatalysts <b>TiO<sub>2</sub>-1A</b> , <b>TiO<sub>2</sub>-2A</b> and <b>TiO<sub>2</sub></b> .....                 | 10 |
| <b>Figure S8.</b> Confocal Raman spectrum for $[\text{Zn}(\mu\text{-HSeO}_3)_2(\text{bipy})]_n$ ( <b>1</b> ).....                                         | 10 |
| <b>Figure S9.</b> Confocal Raman spectrum for $[\text{Zn}(\mu\text{-HSeO}_3)_2(\text{phen})]_n$ ( <b>2</b> ).....                                         | 11 |
| <b>Figure S10.</b> <sup>77</sup> Se NMR spectrum for $[\text{Zn}(\mu\text{-HSeO}_3)_2(\text{bipy})]_n$ ( <b>1</b> ).....                                  | 11 |
| <b>Figure S11.</b> <sup>77</sup> Se NMR spectrum for $[\text{Zn}(\mu\text{-HSeO}_3)_2(\text{bipy})]_n$ ( <b>1</b> ) using 10 kHz rotation.....            | 12 |
| <b>Figure S12.</b> <sup>77</sup> Se NMR spectrum for $[\text{Zn}(\mu\text{-HSeO}_3)_2(\text{phen})]_n$ ( <b>2</b> ).....                                  | 12 |
| <b>Figure S13.</b> Diffuse reflectance spectra of <b>1-2</b> , <b>TiO<sub>2</sub></b> , <b>TiO<sub>2</sub>-1A</b> and <b>TiO<sub>2</sub>-2A</b> .....     | 13 |
| <b>Figure S14.</b> Kubelka-Munk absorbance spectra of <b>1-2</b> , <b>TiO<sub>2</sub></b> , <b>TiO<sub>2</sub>-1A</b> and <b>TiO<sub>2</sub>-2A</b> ..... | 13 |
| <b>Figure S15.</b> Graphical determination of the $E_g$ value of <b>TiO<sub>2</sub></b> .....                                                             | 14 |
| <b>Figure S16.</b> Graphical determination of the $E_g$ value of $[\text{Zn}(\mu\text{-HSeO}_3)_2(\text{bipy})]_n$ ( <b>1</b> ).....                      | 14 |
| <b>Figure S17.</b> Graphical determination of the $E_g$ value of <b>TiO<sub>2</sub>-1A</b> .....                                                          | 15 |
| <b>Figure S18.</b> Graphical determination of the $E_g$ value of $[\text{Zn}(\mu\text{-HSeO}_3)_2(\text{phen})]_n$ ( <b>2</b> ).....                      | 15 |
| <b>Figure S19.</b> Graphical determination of the $E_g$ value of <b>TiO<sub>2</sub>-2A</b> .....                                                          | 16 |
| <b>Figure S20.</b> Element mapping for photocatalyst <b>TiO<sub>2</sub>-1A</b> .....                                                                      | 17 |
| <b>Figure S21.</b> Element mapping for photocatalyst <b>TiO<sub>2</sub>-2A</b> .....                                                                      | 18 |
| <b>Figure S22.</b> EDS spectrum for photocatalyst <b>TiO<sub>2</sub>-1A</b> .....                                                                         | 19 |
| <b>Figure S23.</b> EDS spectrum for photocatalyst <b>TiO<sub>2</sub>-2A</b> .....                                                                         | 19 |
| <b>Figure S24.</b> SEM images for photocatalyst <b>TiO<sub>2</sub>-1A</b> .....                                                                           | 20 |
| <b>Figure S25.</b> SEM images for photocatalyst <b>TiO<sub>2</sub>-2A</b> .....                                                                           | 20 |
| <b>Figure S26.</b> Particle size distribution for the photocatalyst <b>TiO<sub>2</sub>-1A</b> .....                                                       | 21 |
| <b>Figure S27.</b> Particle size distribution for the photocatalyst <b>TiO<sub>2</sub>-2A</b> .....                                                       | 21 |
| <b>Figure S28.</b> Stainless steel reactor used in syntheses of compounds <b>1-2</b> .....                                                                | 22 |
| <b>Figure S29.</b> System used in experiments applying photocatalyst <b>TiO<sub>2</sub>-1A</b> and <b>TiO<sub>2</sub>-2A</b> for hydrogen evaluation..... | 22 |
| <b>Figure S30.</b> Photocatalytic activity of the photocatalyst <b>TiO<sub>2</sub>-1A</b> .....                                                           | 23 |
| <b>Figure S31.</b> Photocatalytic activity of the photocatalyst <b>TiO<sub>2</sub>-2A</b> .....                                                           | 23 |

**Table S1.** Crystallographic and structure refinement data for compounds **1-2**.

|                                                     | <b>1</b>                                                                         | <b>2</b>                                                                         |
|-----------------------------------------------------|----------------------------------------------------------------------------------|----------------------------------------------------------------------------------|
| Formula                                             | C <sub>10</sub> H <sub>10</sub> N <sub>2</sub> O <sub>6</sub> Se <sub>2</sub> Zn | C <sub>12</sub> H <sub>10</sub> N <sub>2</sub> O <sub>6</sub> Se <sub>2</sub> Zn |
| F.W. (g.mol <sup>-1</sup> )                         | 477.49                                                                           | 501.51                                                                           |
| Crystal system                                      | Monoclinic                                                                       | Triclinic                                                                        |
| Space group                                         | C2/c                                                                             | P-1                                                                              |
| <i>a</i> (Å)                                        | 16.9676(8)                                                                       | 7.4196(6)                                                                        |
| <i>b</i> (Å)                                        | 10.9596(5)                                                                       | 9.7542(9)                                                                        |
| <i>c</i> (Å)                                        | 7.4548(3)                                                                        | 11.1087(10)                                                                      |
| <i>α</i> (°)                                        | 90                                                                               | 71.238(3)                                                                        |
| <i>β</i> (°)                                        | 95.478(2)                                                                        | 88.646(3)                                                                        |
| <i>γ</i> (°)                                        | 90                                                                               | 87.737(3)                                                                        |
| T (K)                                               | 299(2)                                                                           | 299(2)                                                                           |
| V (Å <sup>3</sup> )                                 | 1379.95(11)                                                                      | 760.60(12)                                                                       |
| Z                                                   | 4                                                                                | 1                                                                                |
| $\rho_{\text{calc.}}$ (g.cm <sup>-3</sup> )         | 2.289                                                                            | 2.181                                                                            |
| $\mu$ (mm <sup>-1</sup> )                           | 7.083                                                                            | 6.431                                                                            |
| F(000)                                              | 912                                                                              | 480                                                                              |
| Refl. collected                                     | 28932                                                                            | 23456                                                                            |
| Refl. unique ( <i>R</i> <sub>int</sub> )            | 2132 [0.0835]                                                                    | 4648 [0.0673]                                                                    |
| <i>R</i> <sub>1</sub> [ <i>I</i> > 2σ( <i>I</i> )]  | <i>R</i> <sub>1</sub> = 0.0418                                                   | <i>R</i> <sub>1</sub> = 0.0561                                                   |
| <i>wR</i> <sub>2</sub> [ <i>I</i> > 2σ( <i>I</i> )] | <i>wR</i> <sub>2</sub> = 0.0711                                                  | <i>wR</i> <sub>2</sub> = 0.1405                                                  |
| <i>R</i> <sub>1</sub> (all data) <sup>[a]</sup>     | <i>R</i> <sub>1</sub> = 0.0778                                                   | <i>R</i> <sub>1</sub> = 0.1025                                                   |
| <i>wR</i> <sub>2</sub> (all data) <sup>[b]</sup>    | <i>wR</i> <sub>2</sub> = 0.0799                                                  | <i>wR</i> <sub>2</sub> = 0.1558                                                  |
| Goodness-of-fit on <i>F</i> <sup>2</sup>            | 1.046                                                                            | 1.093                                                                            |
| Largest diff. peak and hole (e.Å <sup>-3</sup> )    | 0.687 and -0.575                                                                 | 1.336 and -0.730                                                                 |

<sup>[a]</sup> $R_1 = |F_o - F_c| / |F_o|$ ; <sup>[b]</sup> $wR_2 = [w(F_o^2 - F_c^2)^2 / (wF_o^2)]^{-1/2}$ .

**Table S2.** Selected bond lengths (Å) and angles (°) for compounds **1-2**.

| Bond lengths (Å) |          | Bond angles (°) |            |
|------------------|----------|-----------------|------------|
| <b>1</b>         |          |                 |            |
| Zn1–N1           | 2.201(3) | N1–Zn1–N1'      | 74.71(15)  |
| Zn1–O1           | 2.072(2) | N1'–Zn1–O2''    | 91.34(10)  |
| Zn1–O2''         | 2.098(2) | N1'–Zn1–O1      | 88.44(10)  |
| Se1–O1           | 1.654(2) | O2''–Zn1–O1     | 88.90(10)  |
| Se1–O2           | 1.668(2) | O2–Se1–O1       | 107.49(12) |
| Se1–O3           | 1.754(3) | O2–Se1–O3       | 99.79(13)  |
| O3–H3A           | 0.820(3) | O1–Se1–O3       | 100.44(13) |
| <b>2</b>         |          |                 |            |
| Zn1–N1           | 2.203(6) | N1–Zn1–N2       | 74.9(2)    |
| Zn1–N2           | 2.219(5) | N1–Zn1–O5'      | 88.4(2)    |
| Zn1–O1           | 2.070(5) | O4–Zn1–O1       | 109.62(19) |
| Zn1–O4           | 2.064(5) | O4–Zn1–O5'      | 90.12(19)  |
| Zn1–O5'          | 2.090(5) | O4–Zn1–N2       | 87.3(2)    |
| Se1–O1           | 1.657(5) | O2–Se1–O1       | 100.3(2)   |
| Se1–O2           | 1.756(5) | O2–Se1–O3       | 99.3(2)    |
| Se1–O3           | 1.668(5) | O1–Se1–O3       | 106.7(2)   |
| O2–H2A           | 0.820(5) |                 |            |

**1** ('): -x+1,y,-z+1/2; (''): -x+1,-y+1,-z+1

**2** ('): -x+2,-y+1,-z+1

**Table S3.** Selected hydrogen bond lengths (Å) and angles (°) for compounds **1-2**.

| D–H...A      | d(D–H) | d(H...A) | d(D...A) | <(DHA) |
|--------------|--------|----------|----------|--------|
| <b>1</b>     |        |          |          |        |
| O3–H3A...O2' | 0.82   | 1.87     | 2.685(4) | 172.3  |
| <b>2</b>     |        |          |          |        |
| O2–H2A...O5  | 0.82   | 1.90     | 2.699(7) | 164.1  |

**1** ('): -x+1,y,-z+1/2

**Table S4.** Time (t) and temperature (T) used to obtain **1-2**.

| n | t <sub>n</sub> (minutes) <sup>a</sup> | T <sub>n</sub> (°C) <sup>b</sup> |
|---|---------------------------------------|----------------------------------|
| 0 | –                                     | 90                               |
| 1 | 60                                    | 110                              |
| 2 | 60                                    | 130                              |
| 3 | 60                                    | 140                              |
| 4 | 240                                   | 140                              |
| 5 | 120                                   | 130                              |
| 6 | 120                                   | 120                              |
| 7 | 120                                   | 100                              |
| 8 | 120                                   | 80                               |
| 9 | 300                                   | 40                               |

Total time: 20 h, with 4 h at 140 °C.

a) time required for the oven to reach T<sub>n</sub>; b) temperature in the reactor.

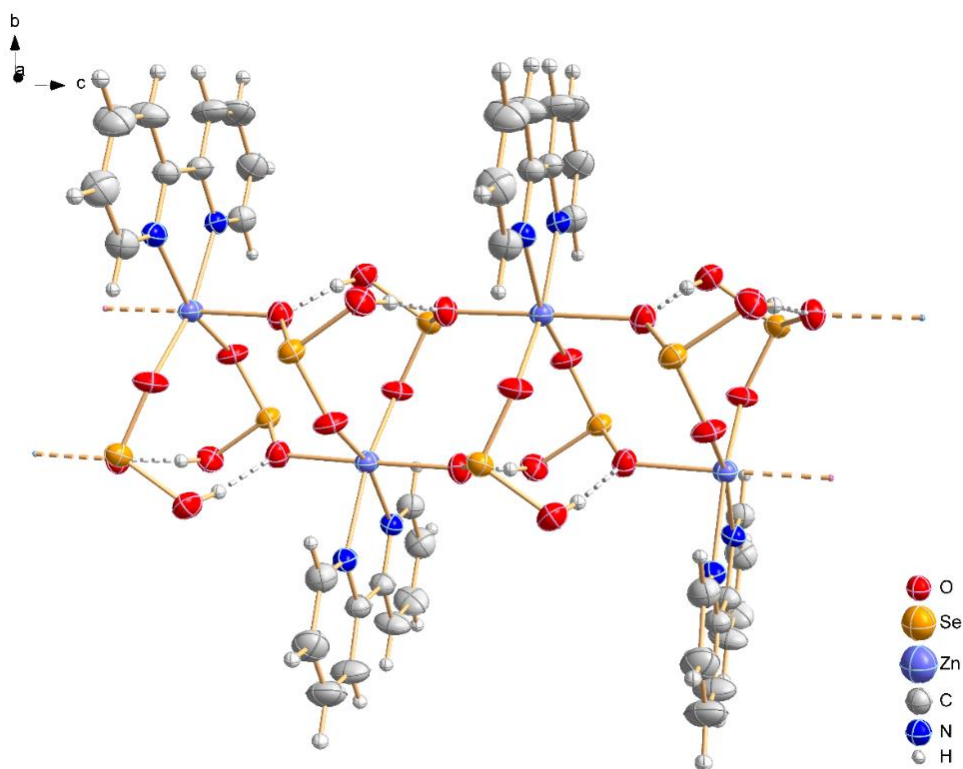

**Figure S1.** ORTEP<sup>12</sup> representation of the polymeric structure of  $[\text{Zn}(\mu\text{-HSeO}_3)_2(\text{bipy})]_n$  (1). The thermal ellipsoids indicate the 50% probability level.

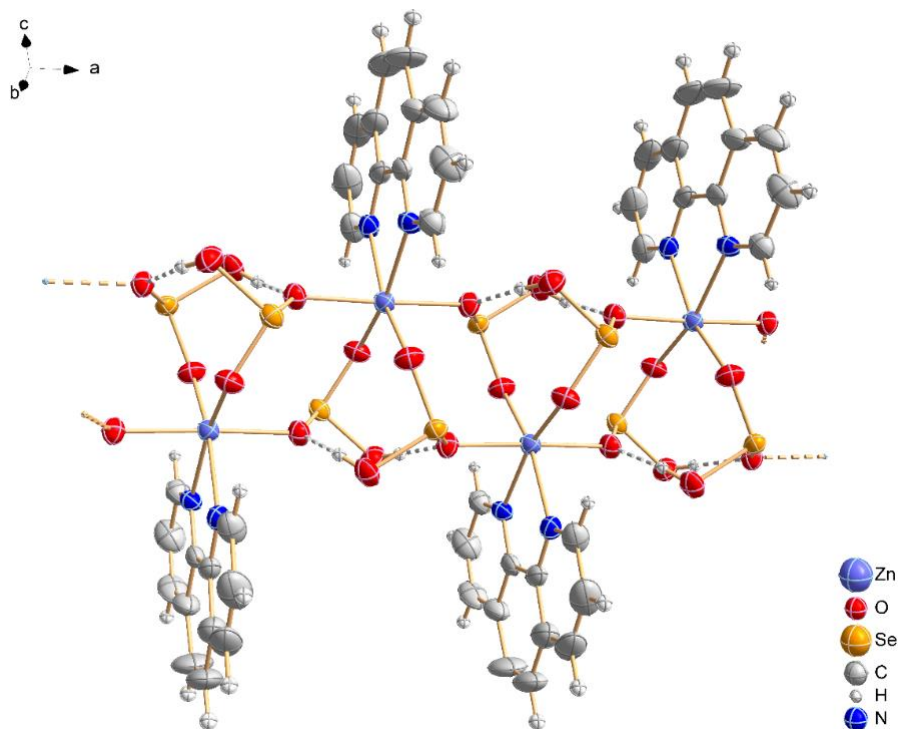

**Figure S2.** ORTEP<sup>12</sup> representation of the polymeric structure of  $[\text{Zn}(\mu\text{-HSeO}_3)_2(\text{phen})]_n$  (2). The thermal ellipsoids indicate the 50% probability level.

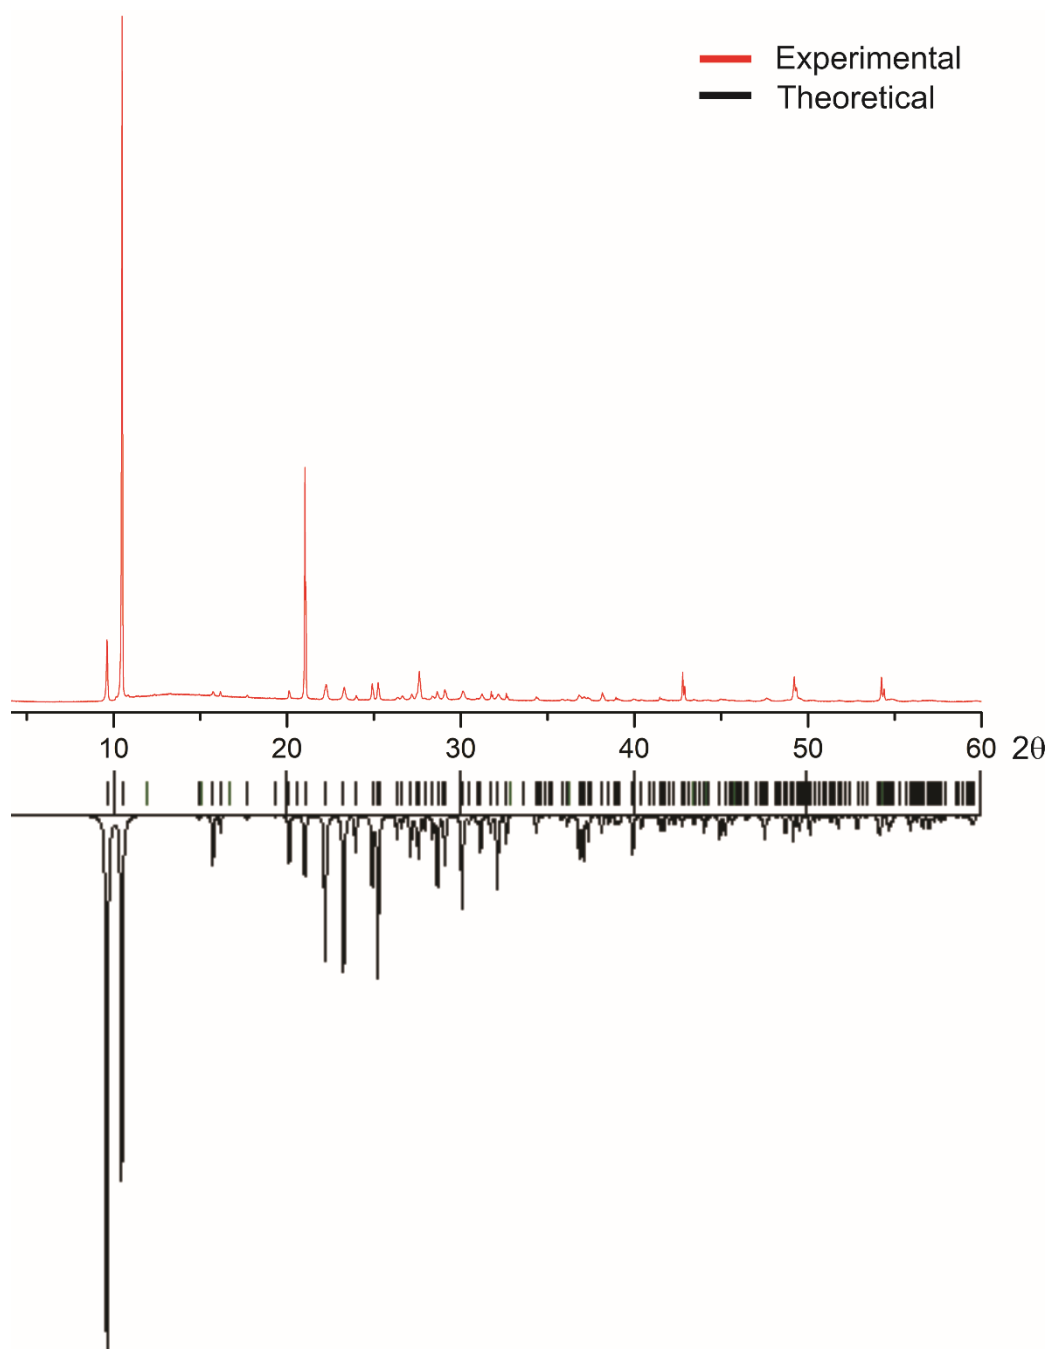

**Figure S3.** Simulated and experimental PXRD pattern for  $[\text{Zn}(\mu\text{-HSeO}_3)_2(\text{bipy})]_n$  (**1**).

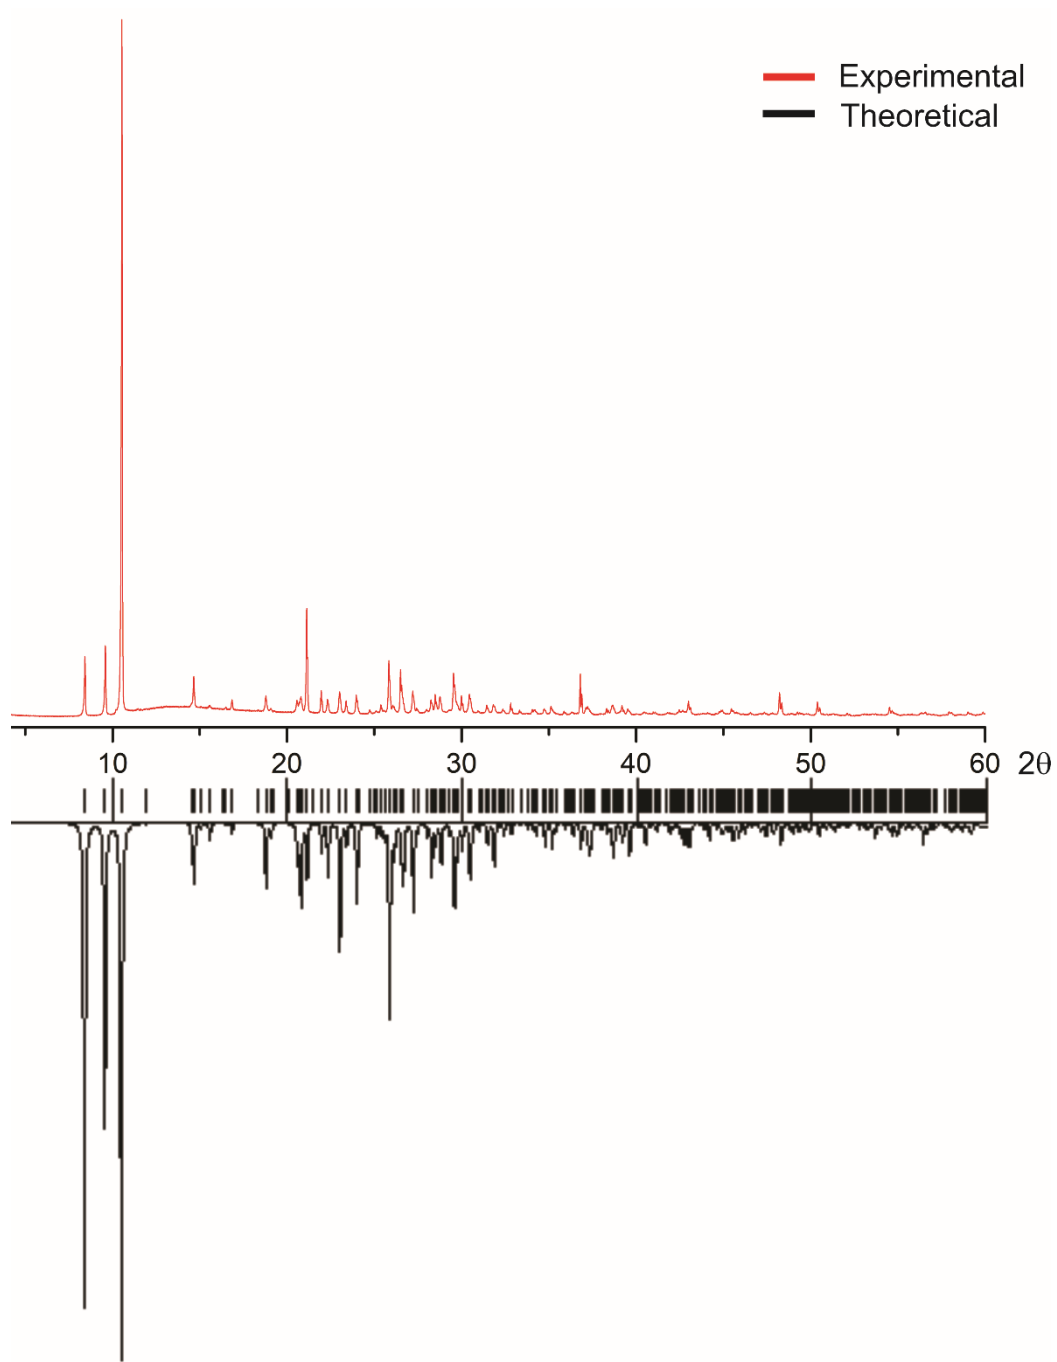

**Figure S4.** Simulated and experimental PXRD pattern for  $[\text{Zn}(\mu\text{-HSeO}_3)_2(\text{phen})]_n$  (**2**).



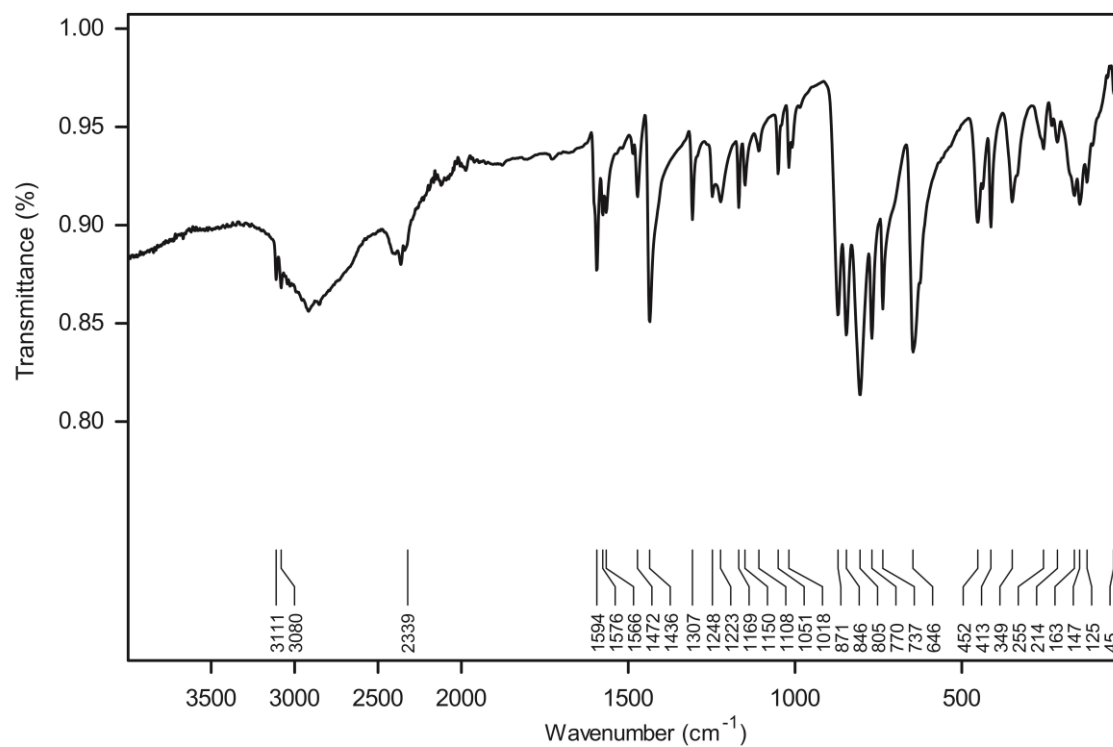

**Figure S5.** FT-IR spectrum for  $[\text{Zn}(\mu\text{-HSeO}_3)_2(\text{bipy})]_n$  (**1**).

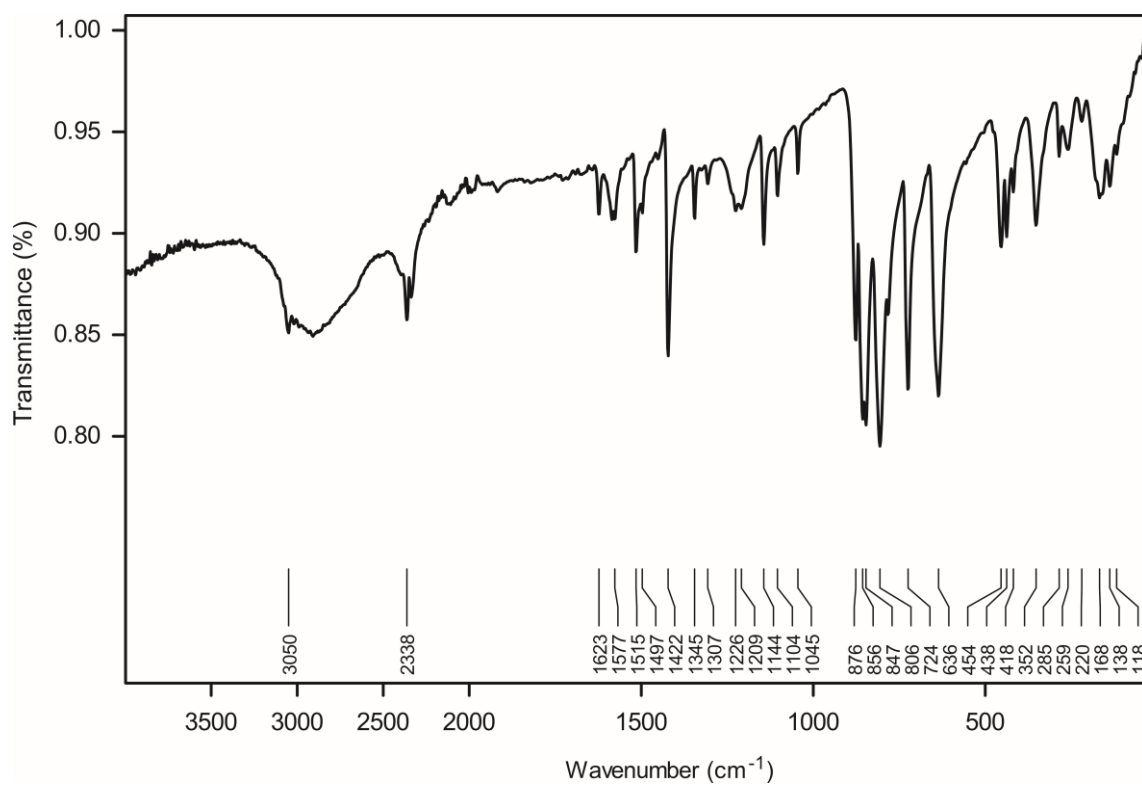

**Figure S6.** FT-IR spectrum for  $[\text{Zn}(\mu\text{-HSeO}_3)_2(\text{phen})]_n$  (**2**).

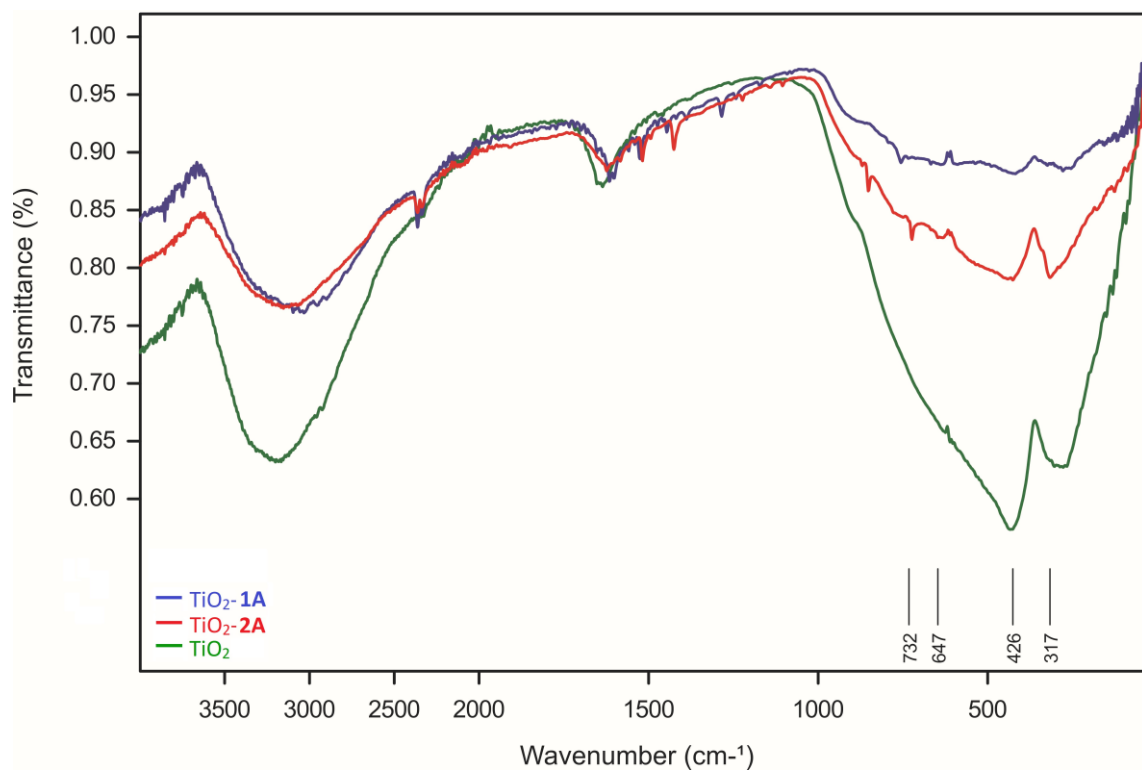

**Figure S7.** FT-IR spectrum of photocatalysts TiO<sub>2</sub>-1A, TiO<sub>2</sub>-2A and TiO<sub>2</sub>.

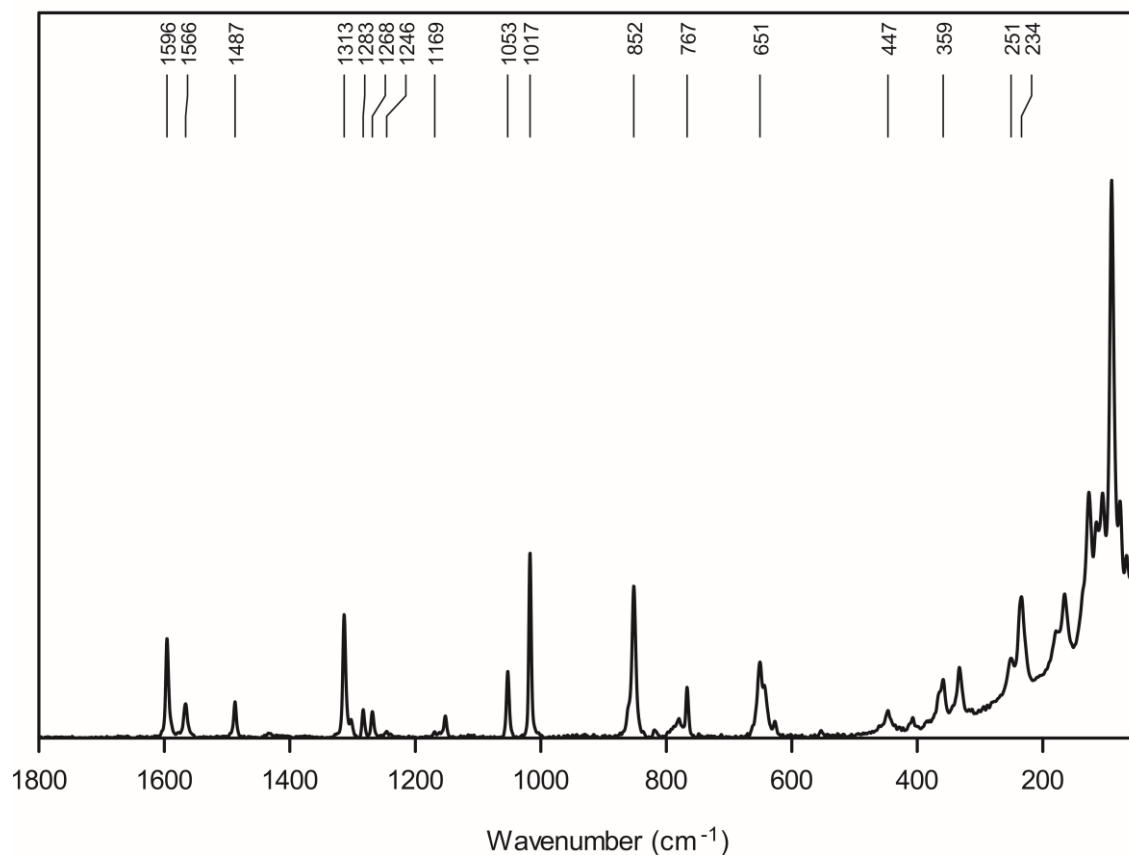

**Figure S8.** Confocal Raman spectrum for [Zn(μ-HSeO<sub>3</sub>)<sub>2</sub>(bipy)]<sub>n</sub> (1).

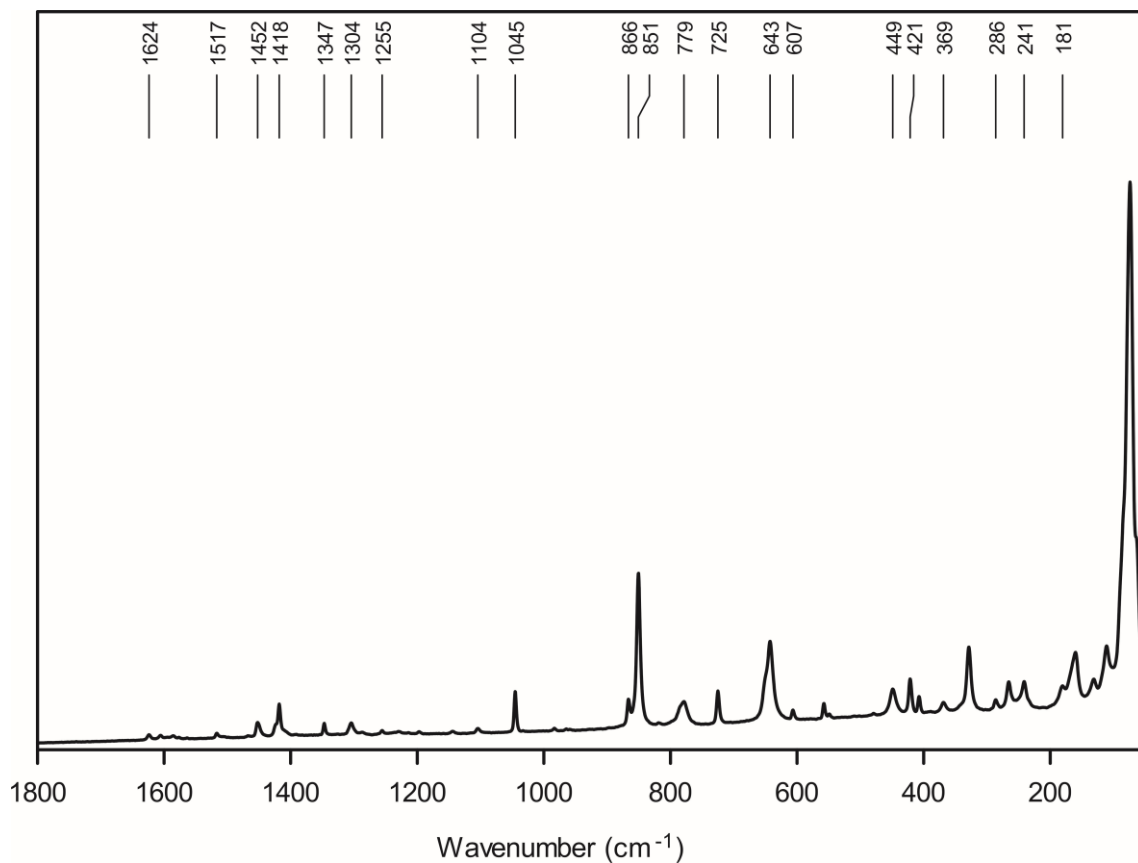

**Figure S9.** Confocal Raman spectrum for  $[\text{Zn}(\mu\text{-HSeO}_3)_2(\text{phen})]_n$  (**2**).

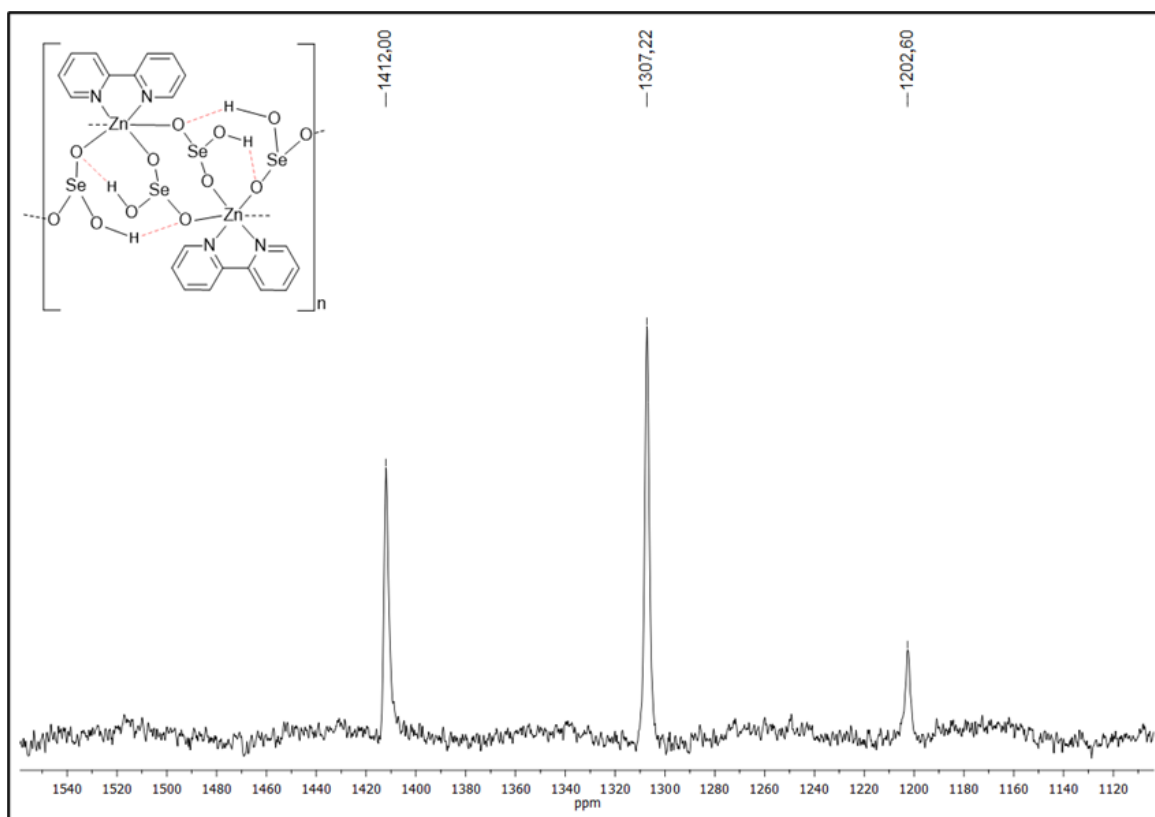

**Figure S10.**  $^{77}\text{Se}$  NMR spectrum for  $[\text{Zn}(\mu\text{-HSeO}_3)_2(\text{bipy})]_n$  (**1**)

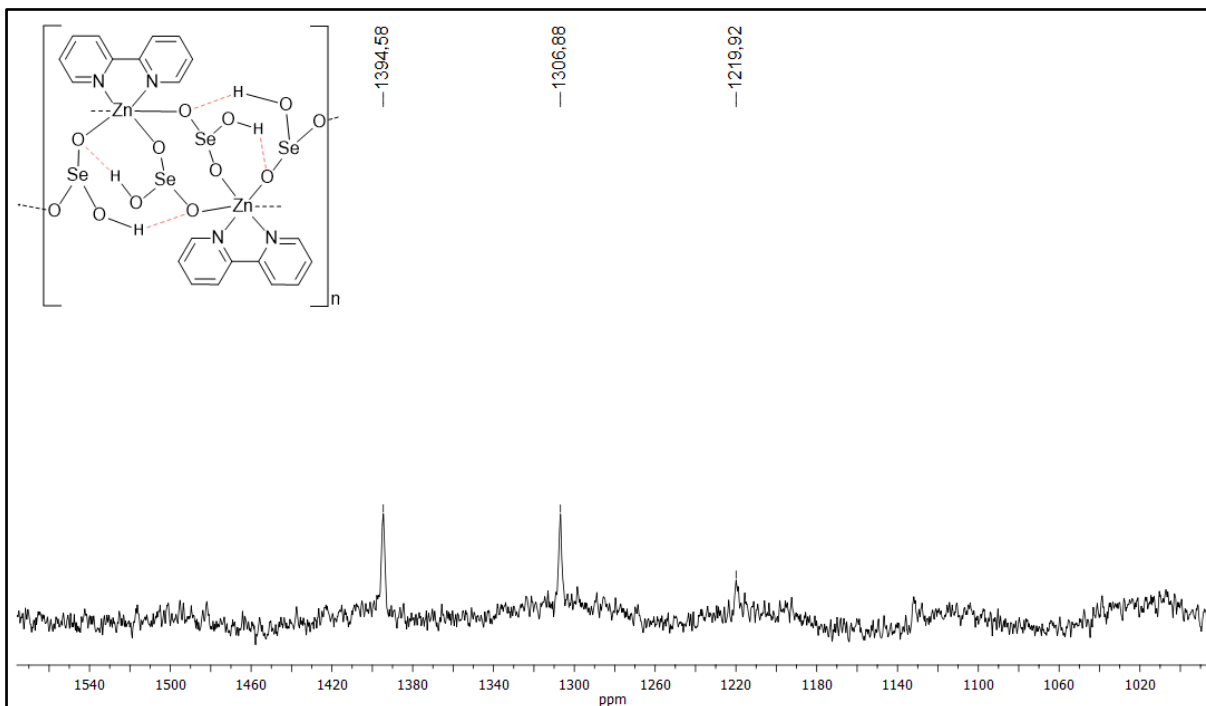

**Figure S11.**  $^{77}\text{Se}$  NMR spectrum for  $[\text{Zn}(\mu\text{-HSeO}_3)_2(\text{bipy})]_n$  (**1**) using 10 kHz rotation.

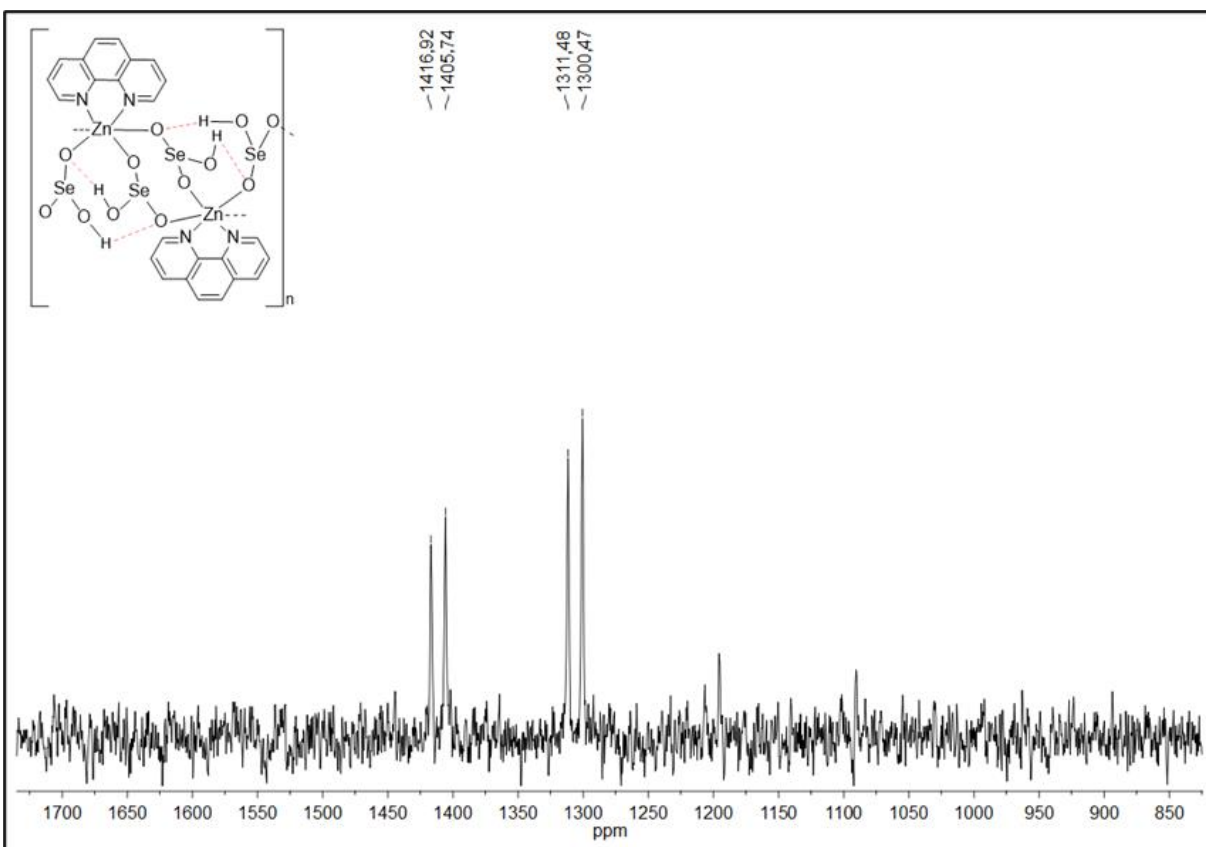

**Figure S12.**  $^{77}\text{Se}$  NMR spectrum for  $[\text{Zn}(\mu\text{-HSeO}_3)_2(\text{phen})]_n$  (**2**).

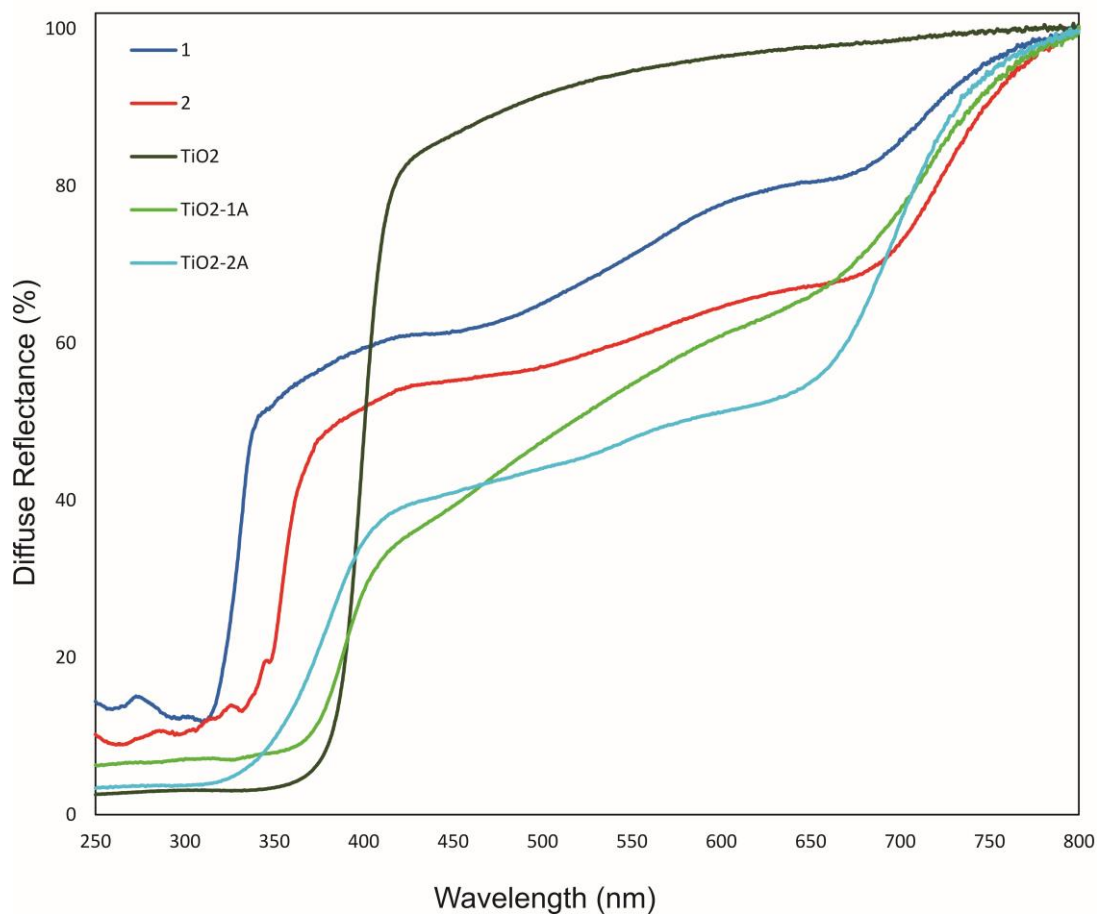

**Figure S13.** Diffuse reflectance spectra of **1-2**,  $\text{TiO}_2$ ,  $\text{TiO}_2\text{-1A}$  and  $\text{TiO}_2\text{-2A}$ .

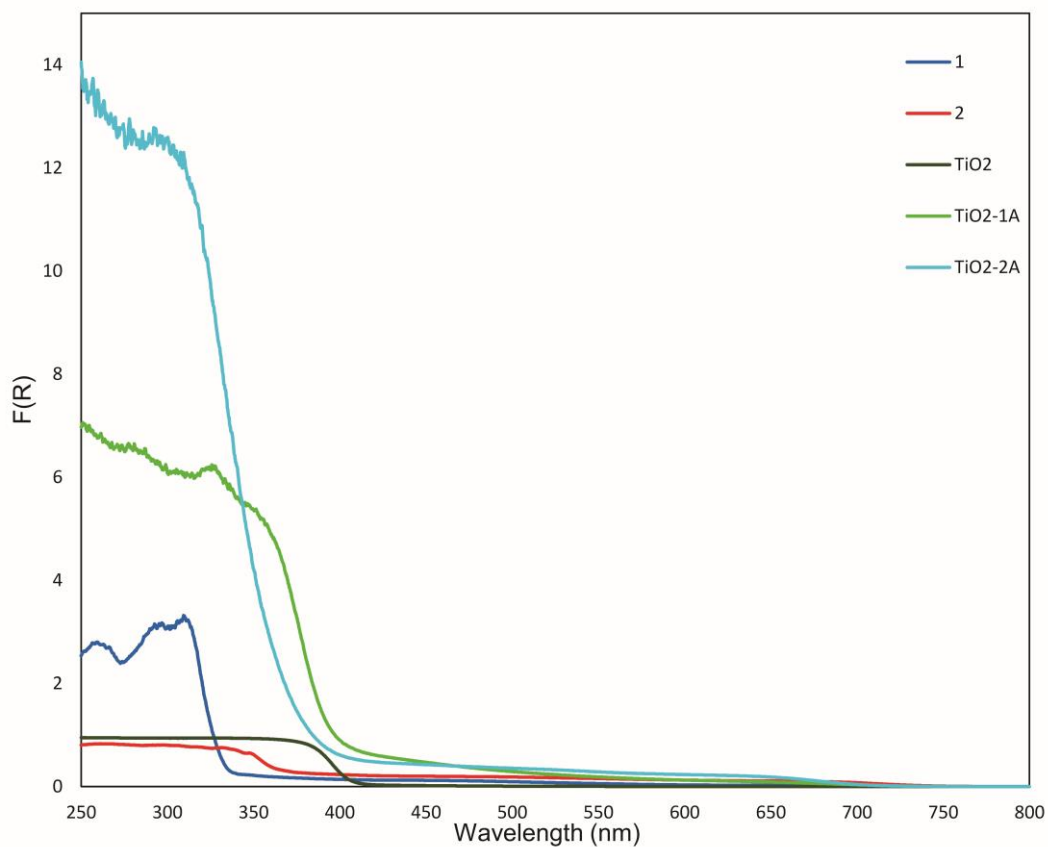

**Figure S14.** Kubelka-Munk absorbance spectra of **1-2**,  $\text{TiO}_2$ ,  $\text{TiO}_2\text{-1A}$  and  $\text{TiO}_2\text{-2A}$ .

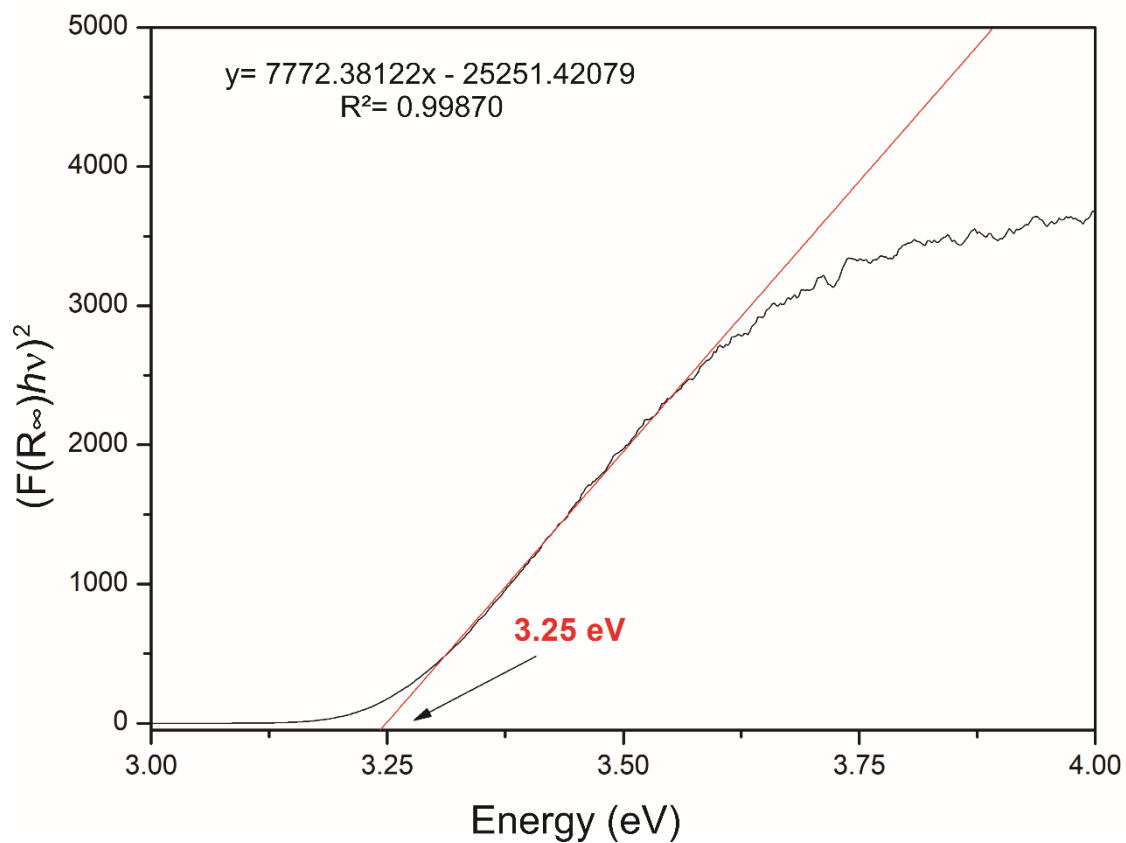

**Figure S15.** Graphical determination of the  $E_g$  value of  $\text{TiO}_2$ .

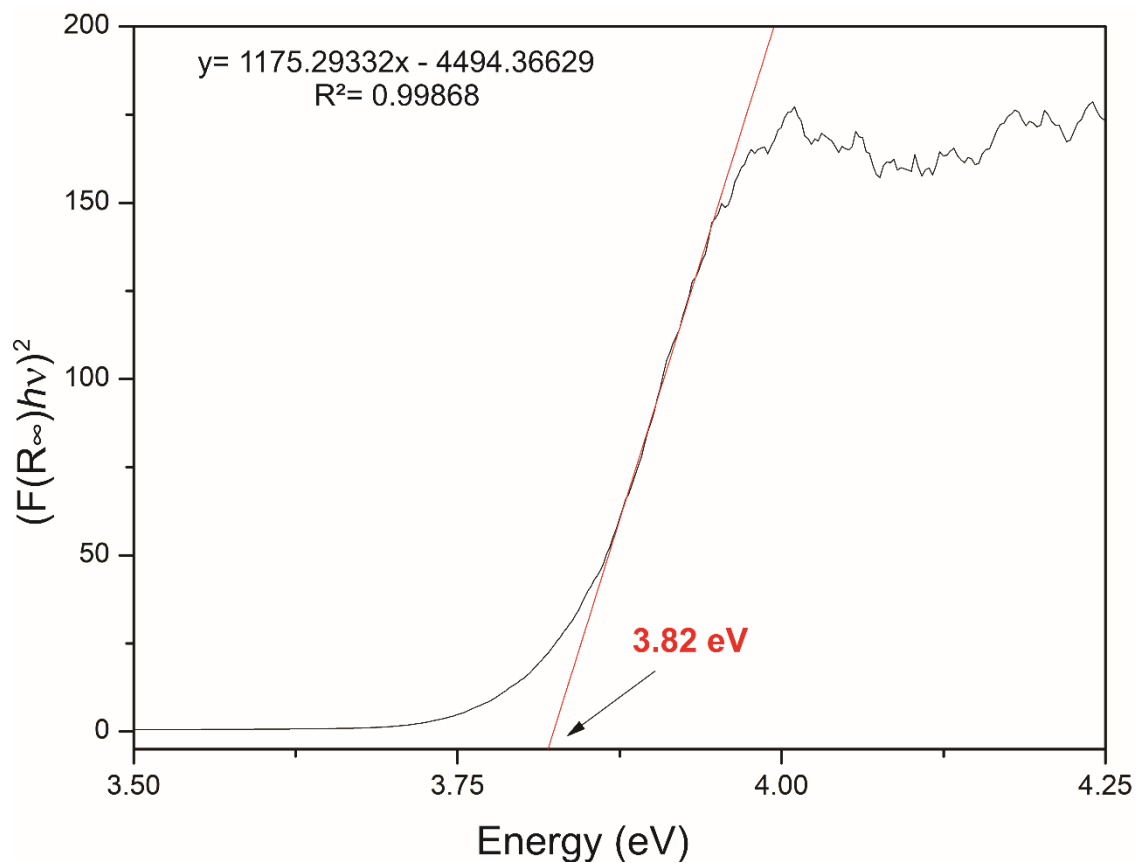

**Figure S16.** Graphical determination of the  $E_g$  value of  $[\text{Zn}(\mu\text{-HSeO}_3)_2(\text{bipy})]_n$  (**1**).

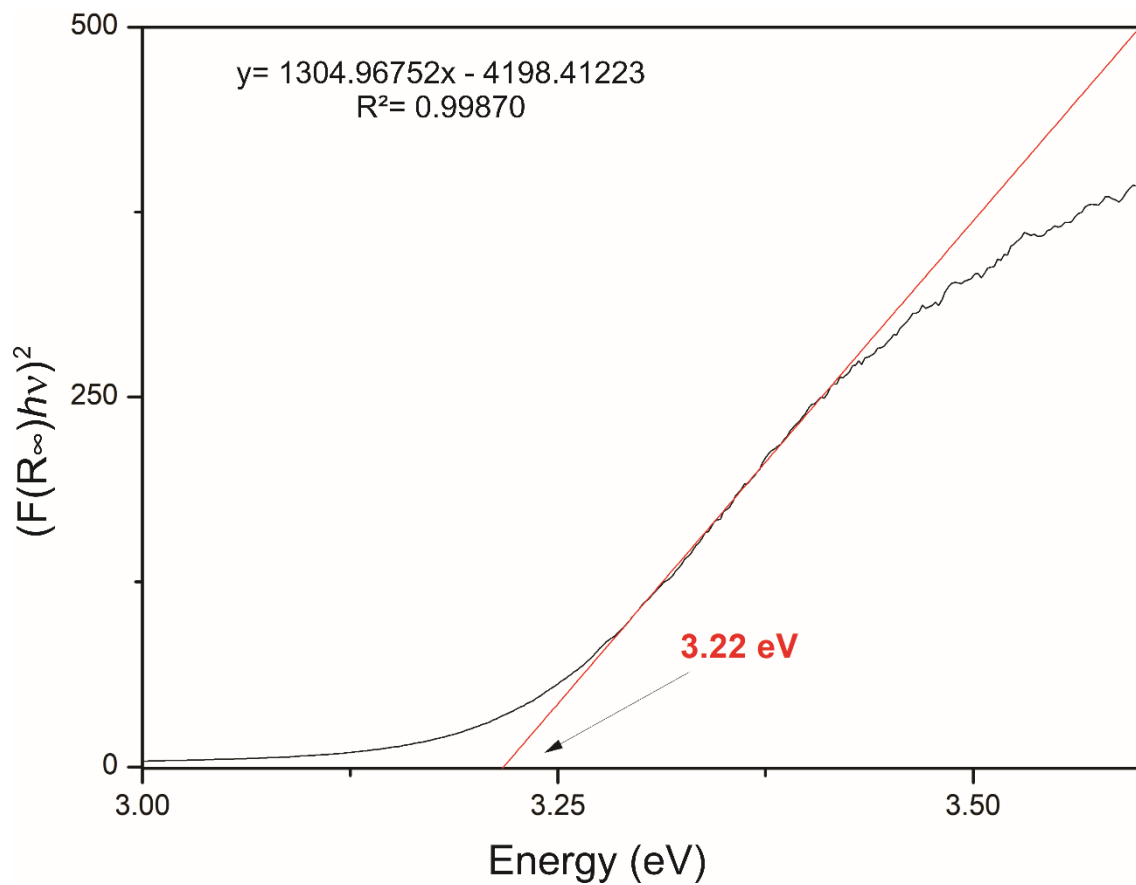

**Figure S17.** Graphical determination of the  $E_g$  value of  $\text{TiO}_2\text{-1A}$ .

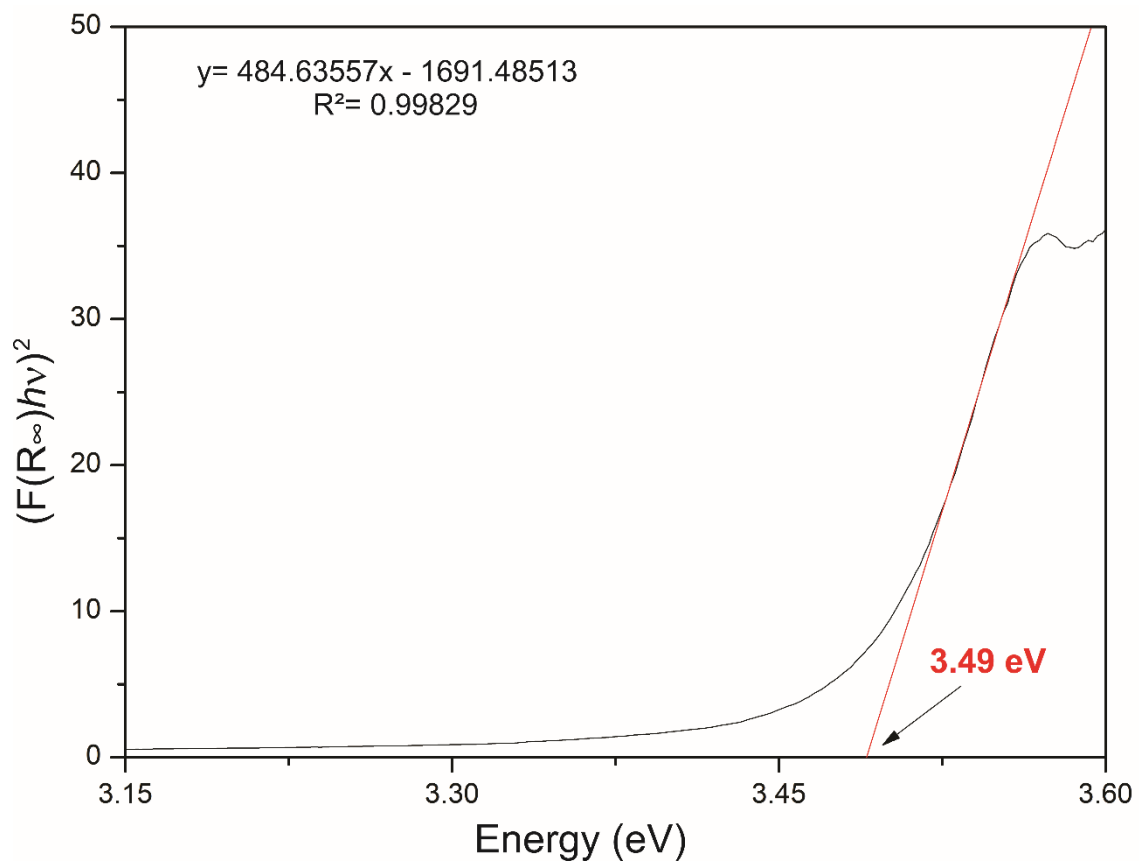

**Figure S18.** Graphical determination of the  $E_g$  value of  $[\text{Zn}(\mu\text{-HSeO}_3)_2(\text{phen})]_n$  (**2**).

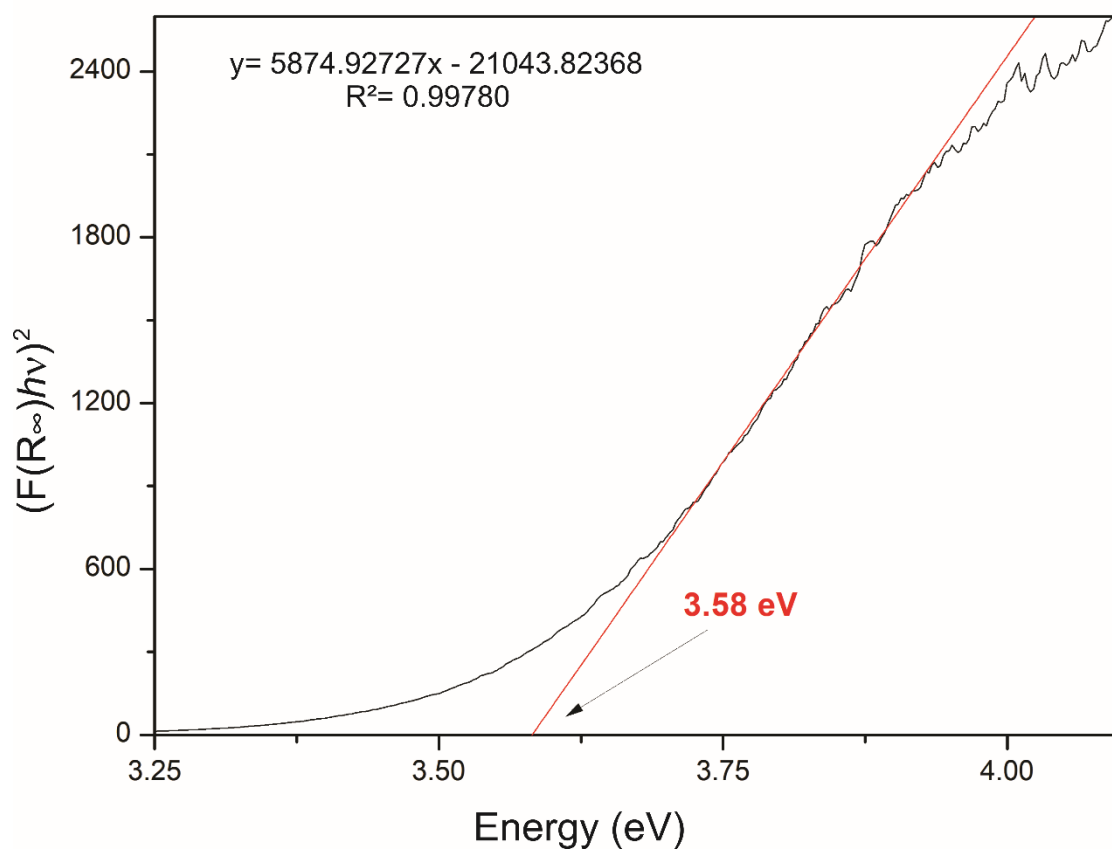

**Figure S19.** Graphical determination of the  $E_g$  value of  $\text{TiO}_2\text{-2A}$ .



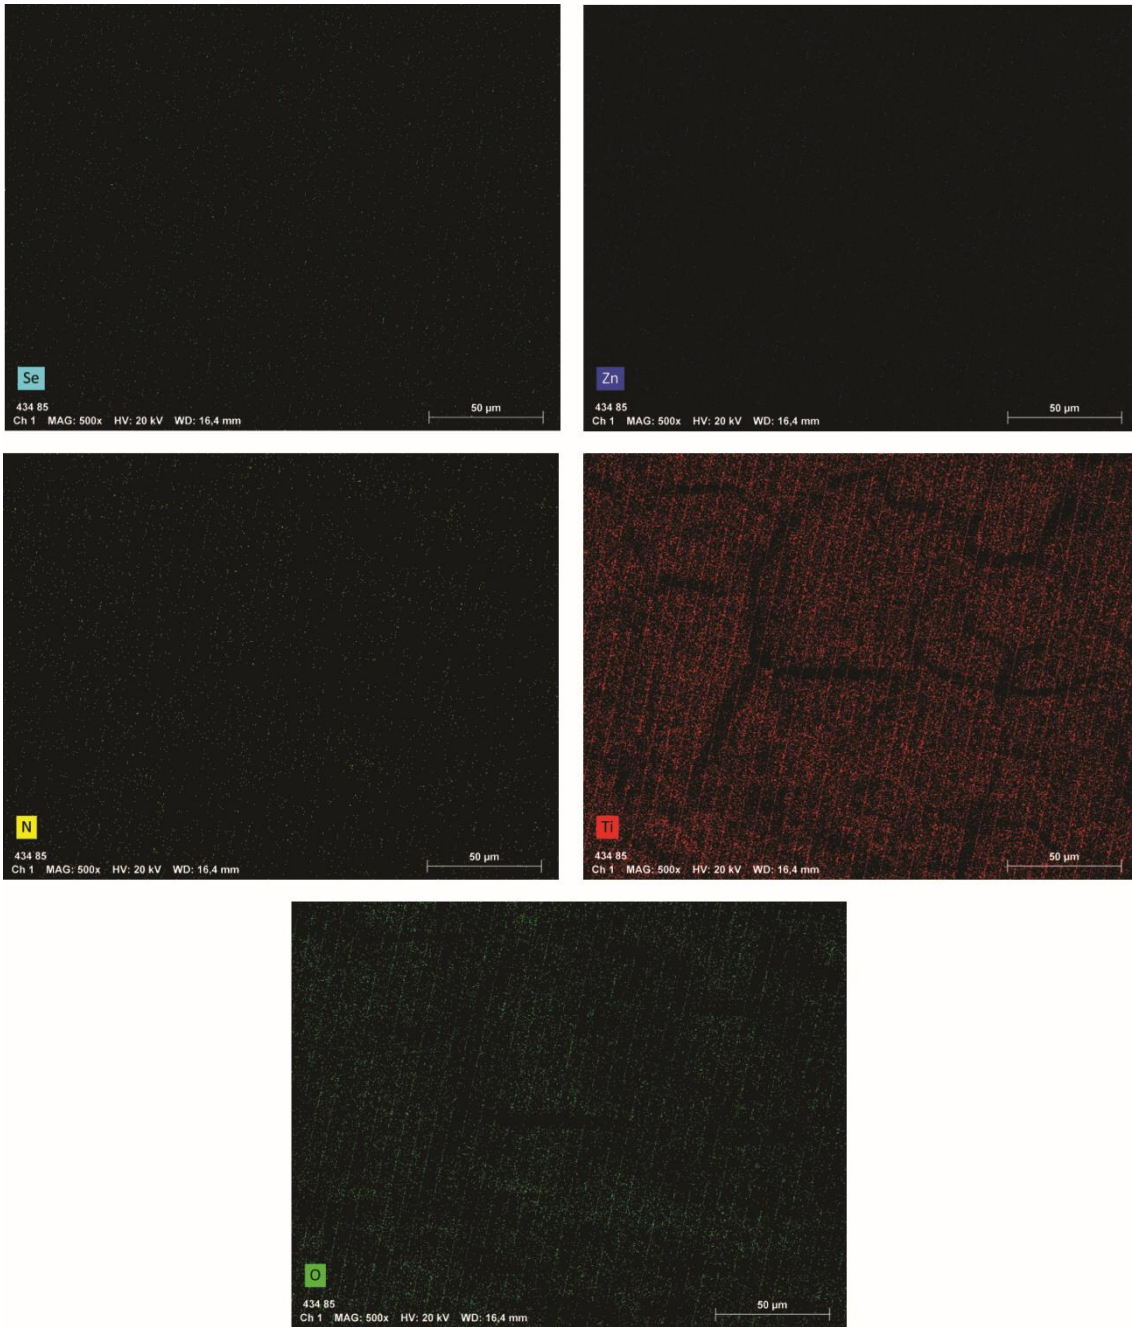

**Figure S20.** Element mapping for photocatalyst  $\text{TiO}_2\text{-1A}$ .

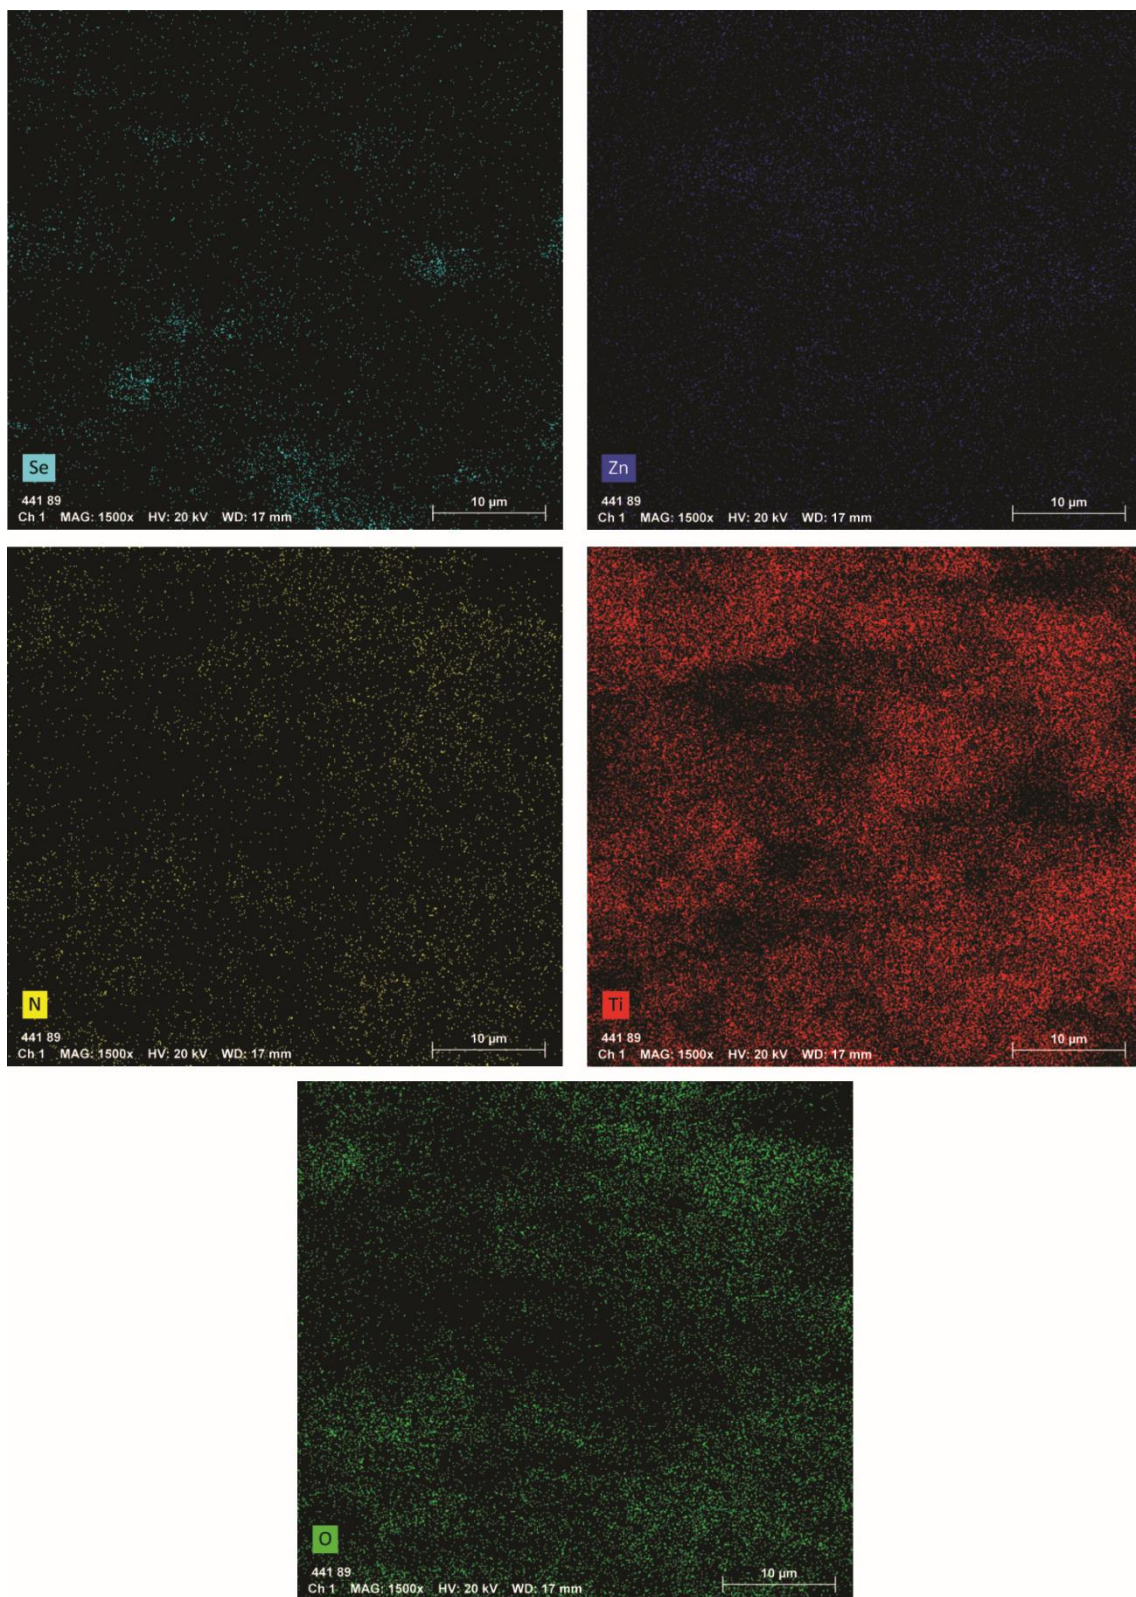

**Figure S21.** Element mapping for photocatalyst TiO<sub>2</sub>-2A.

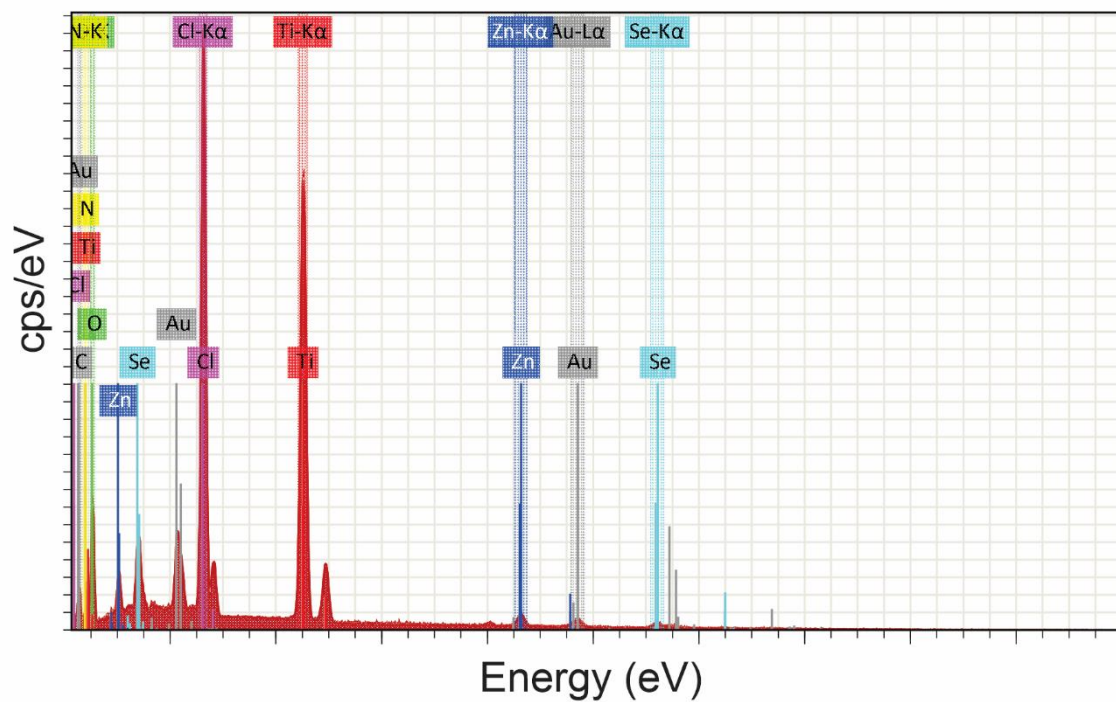

**Figure S22.** EDS spectrum for photocatalyst TiO<sub>2</sub>-1A. The element Au comes from metallization process.

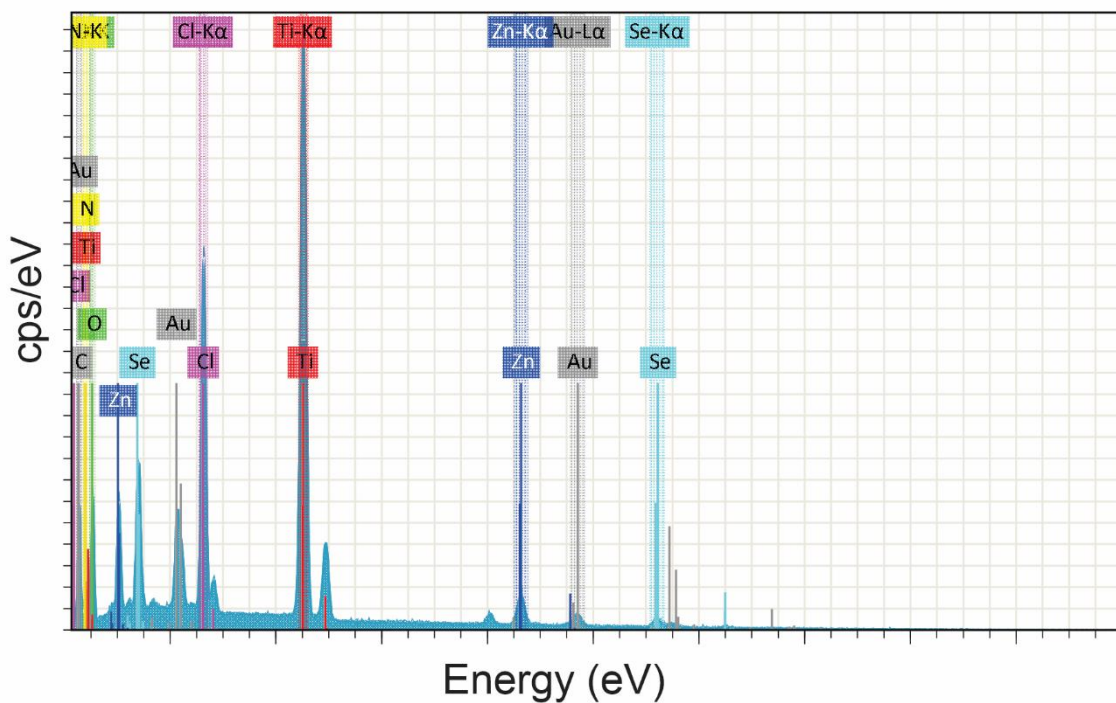

**Figure S23.** EDS spectrum for photocatalyst TiO<sub>2</sub>-2A. The element Au comes from metallization process.

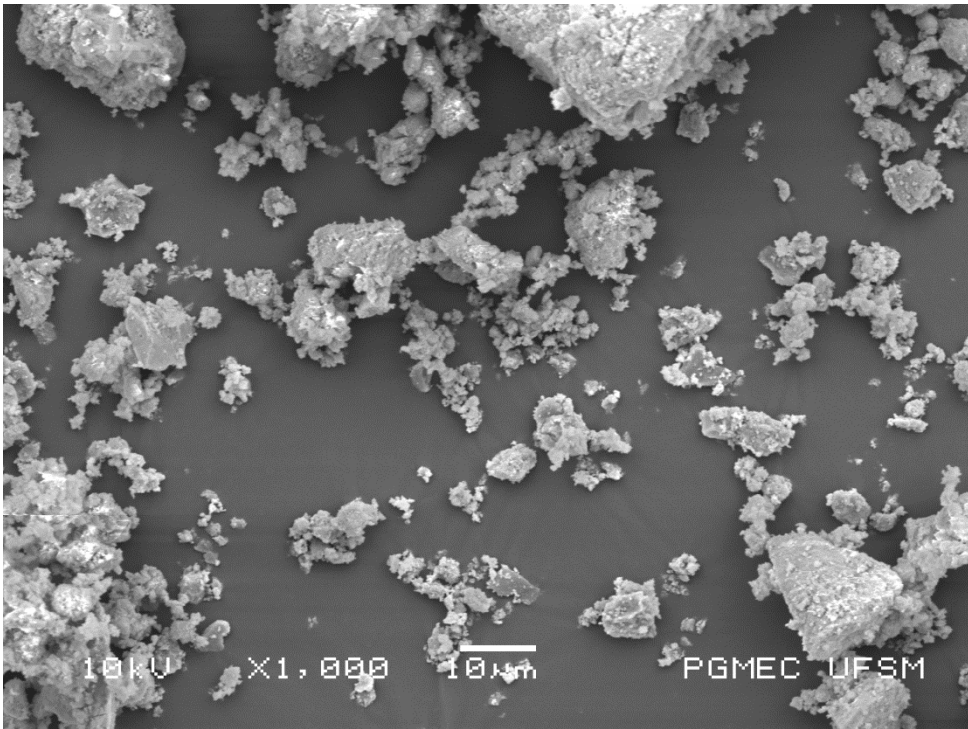

**Figure S24.** SEM images for photocatalyst TiO<sub>2</sub>-1A.

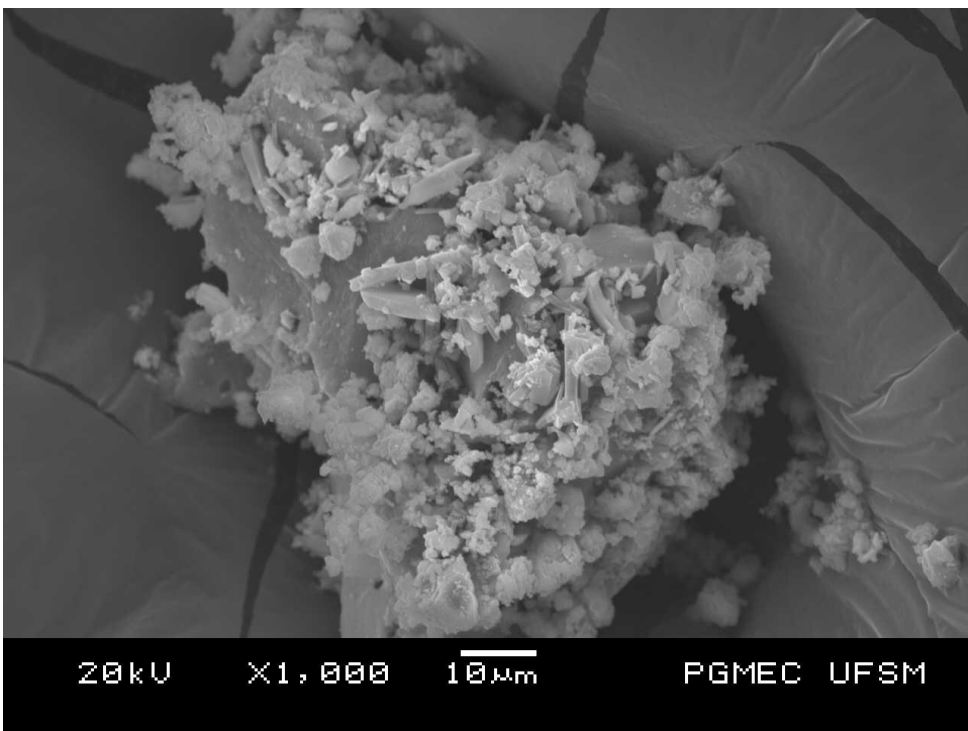

**Figure S25.** SEM images for photocatalyst TiO<sub>2</sub>-2A.

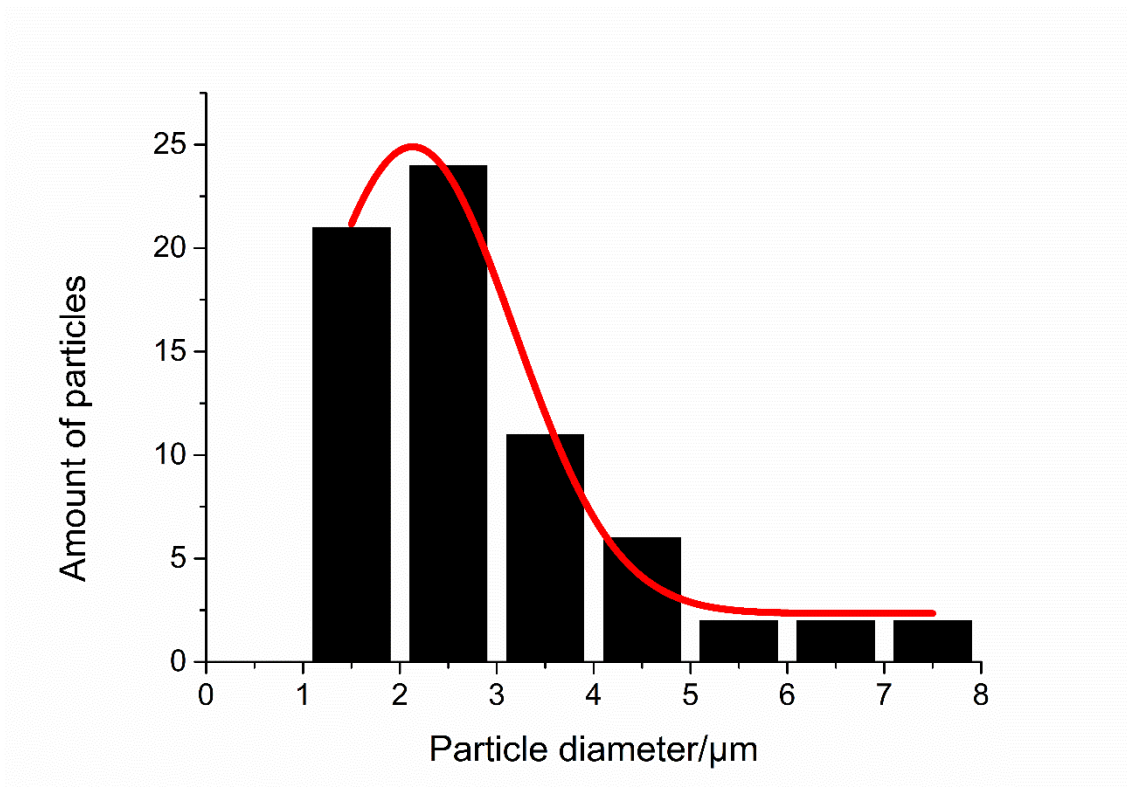

**Figure S26.** Particle size distribution for the photocatalyst TiO<sub>2</sub>-1A.

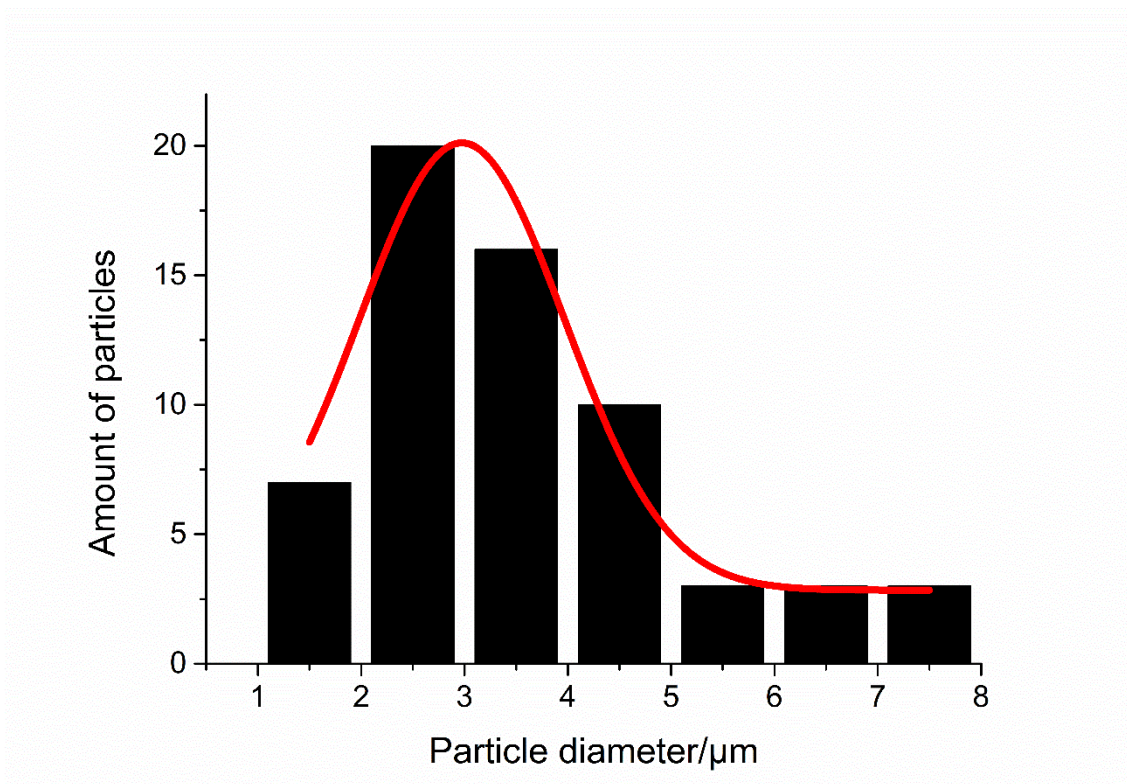

**Figure S27.** Particle size distribution for the photocatalyst TiO<sub>2</sub>-2A.

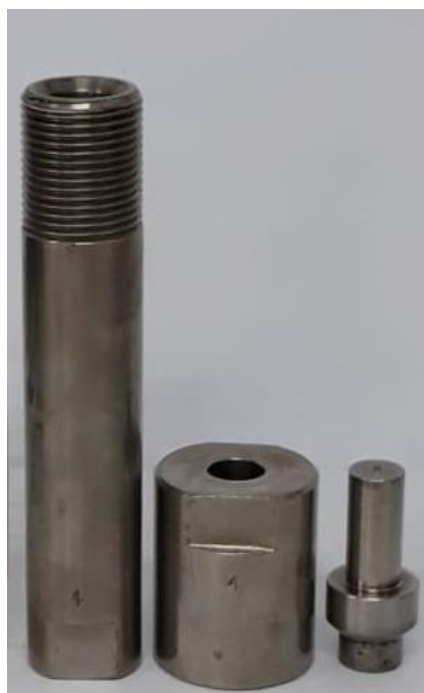

**Figure S28.** Stainless steel reactor used in syntheses of compounds **1-3**.

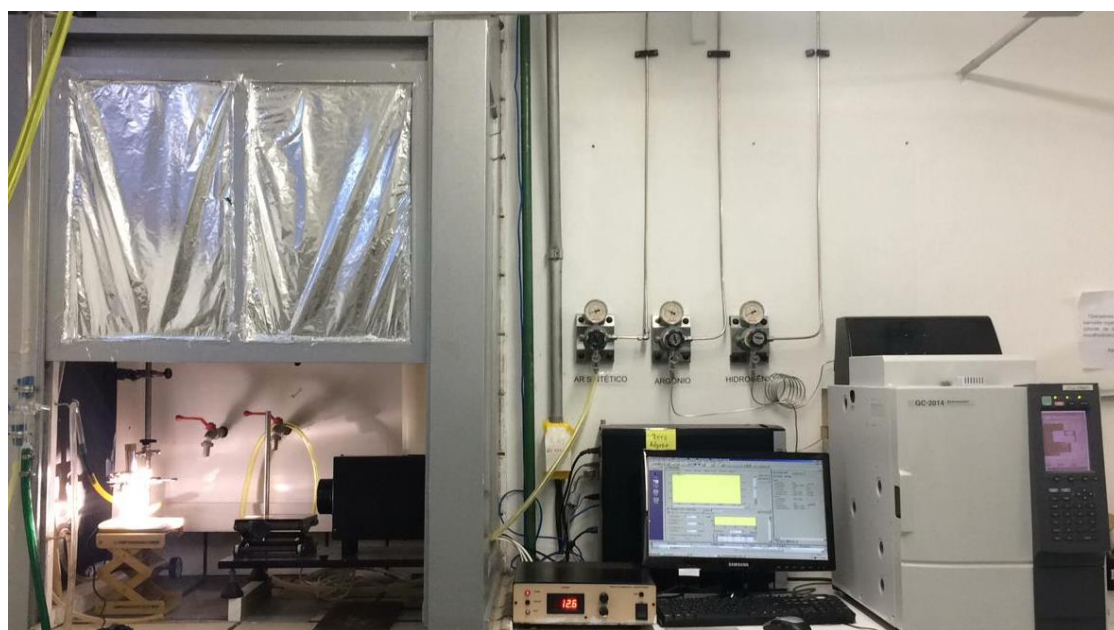

**Figure S29.** System used in experiments applying photocatalyst **TiO<sub>2</sub>-1A** and **TiO<sub>2</sub>-2A** for hydrogen evaluation.

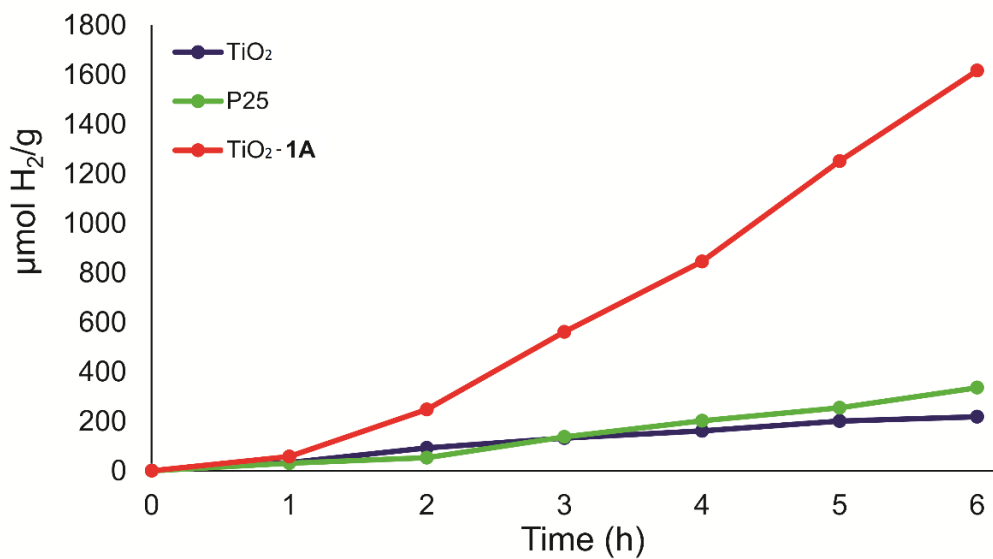

**Figure S30.** Photocatalytic activity of the photocatalyst TiO<sub>2</sub>-1A.

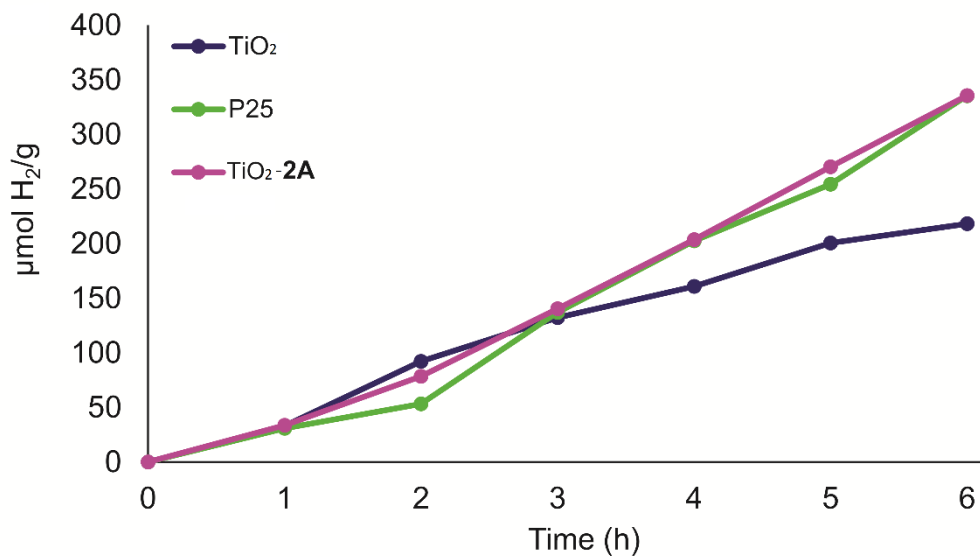

**Figure S31.** Photocatalytic activity of the photocatalyst TiO<sub>2</sub>-2A.
